# Supplementary material
Source: PubMed Central journal article supplement (PMC5019344)

Figure 5c

Extended Data Figure 1h

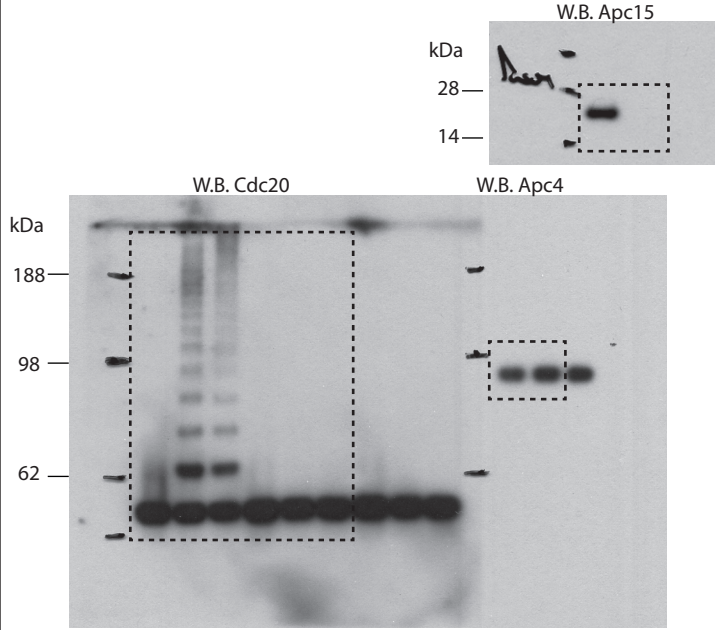

Extended Data Figure 1h (Top)  
Figure 5d (Bottom)

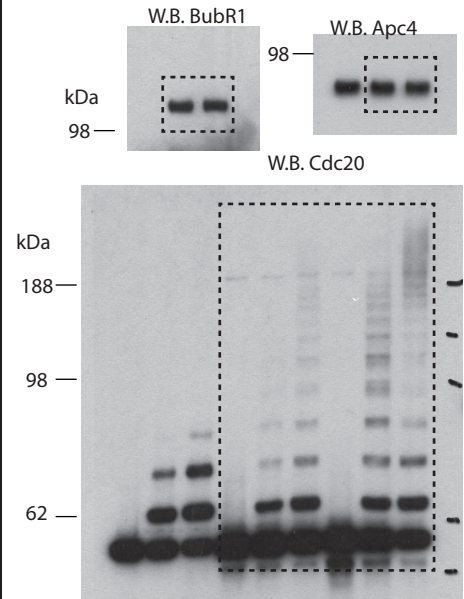

Figure 5e

Extended Data Figure 1h

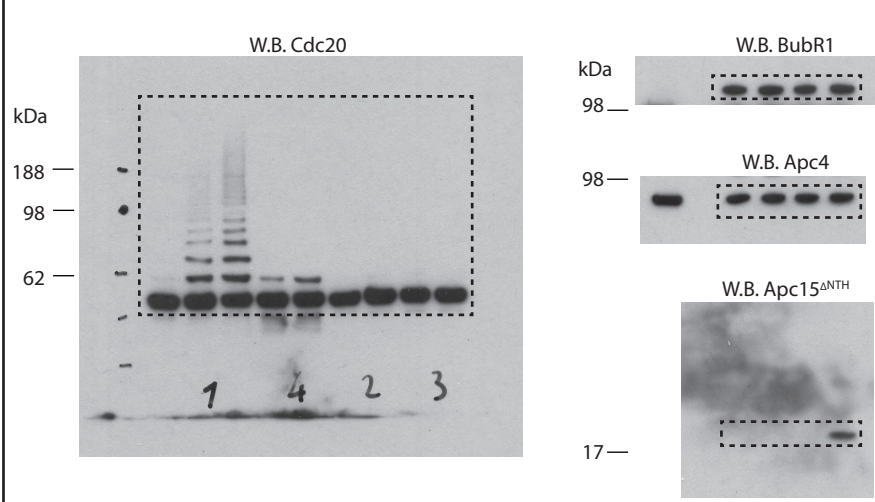

Extended Data Figure 1a

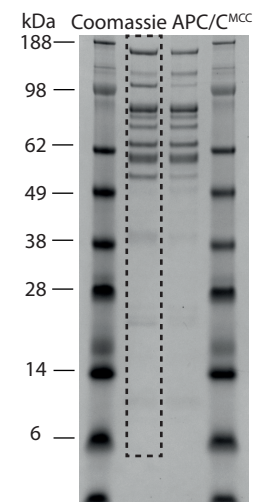

Extended Data Figure 1b (left) and c (right)

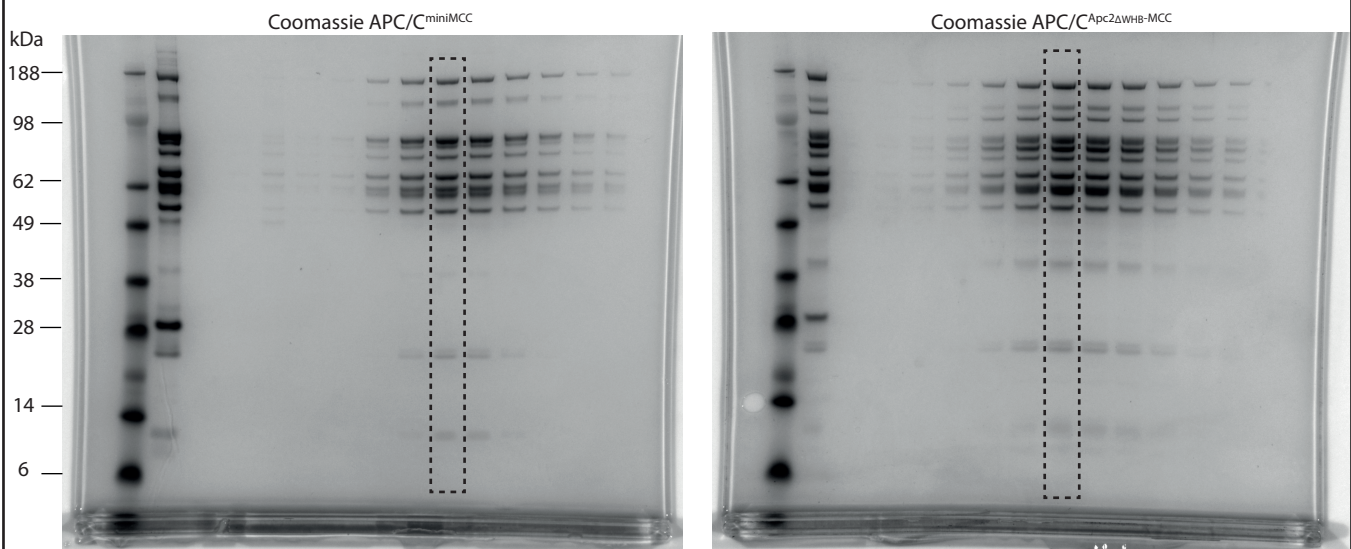

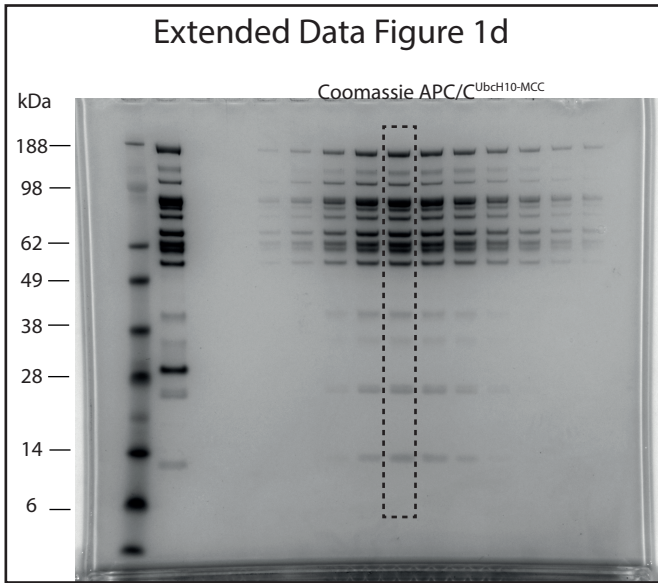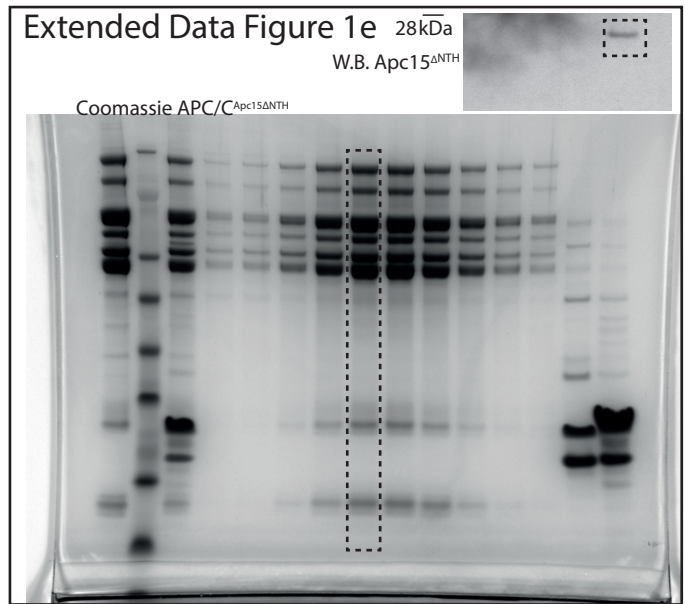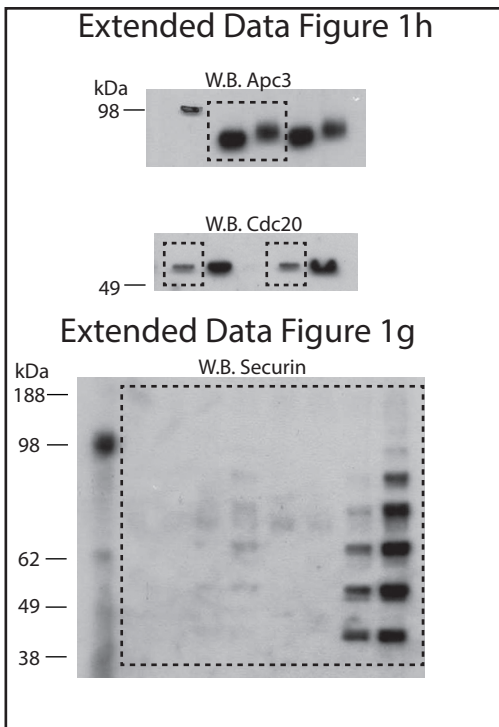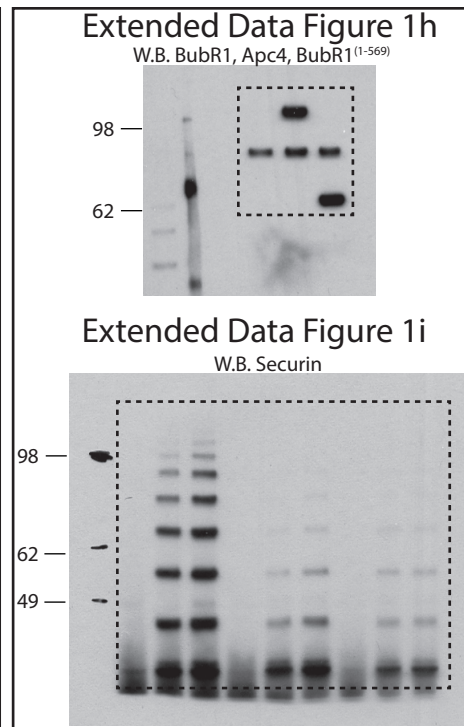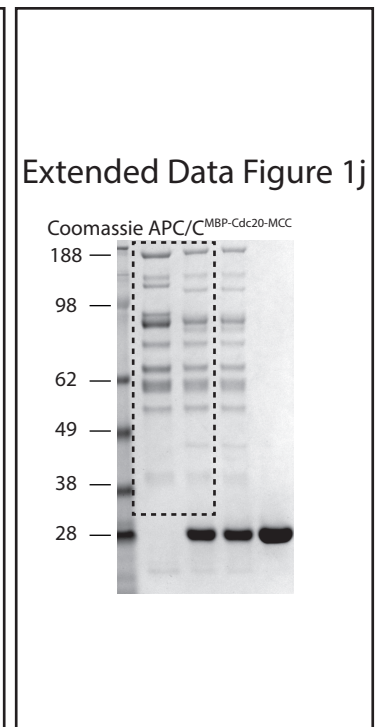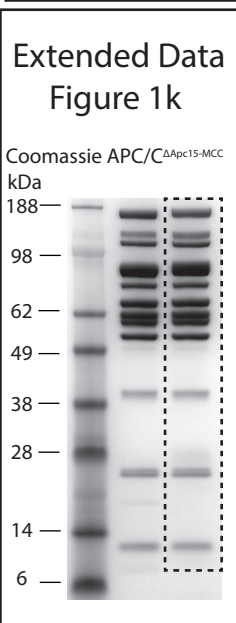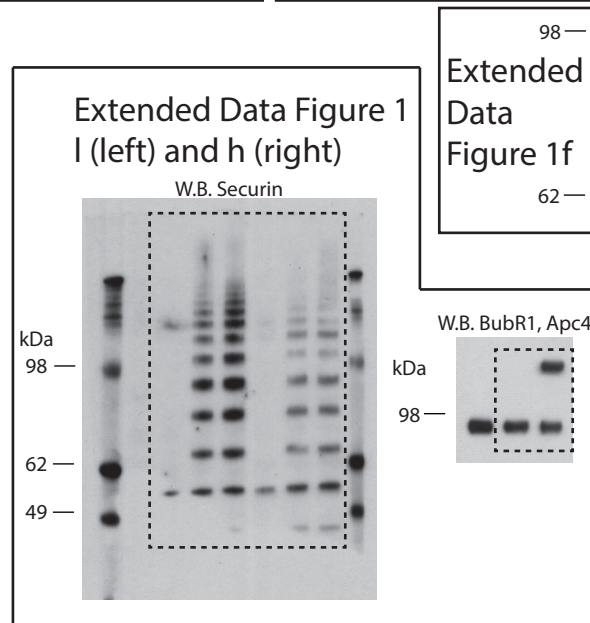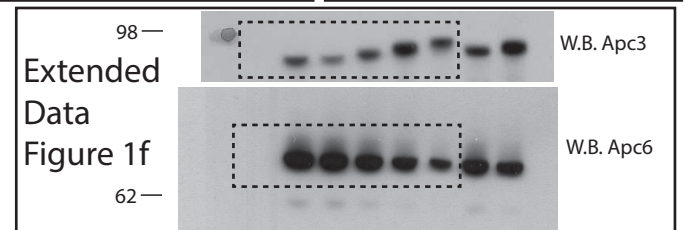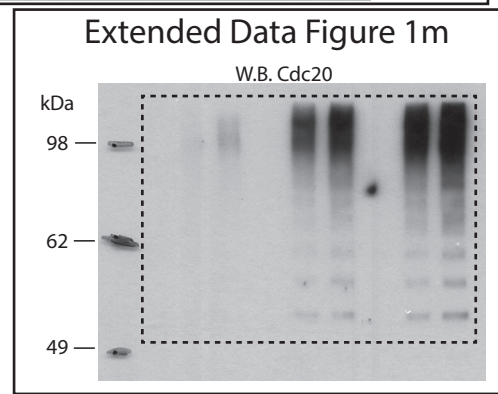

Supplement: NIHMS69174-supplement-Supplementary_Fig__1.pdf [file NIHMS69174-supplement-Supplementary_Fig__1.pdf]
